# Supplementary material
Source: PubMed Central journal article supplement (PMC2206587)
Supplement: pnas_0711200105_5.pdf [file pnas_0711200105_5.pdf]

**Table 7. Influence of mouse strain, LCMV isolate and dose on hemorrhagic anemia**

| Treatment                              | Mouse strain       | <i>n</i> | Days p.i. | Percent survival | Skin hemorrhage | FOB | Hct (percent) | OAS BM     |
|----------------------------------------|--------------------|----------|-----------|------------------|-----------------|-----|---------------|------------|
| NaCl                                   | B10D2              | 6        | 6         | 100              | -               | neg | 47.2 ± 3.5    | 1          |
| α-Irr + LCMV WE (10 <sup>6</sup> PFU)  | B10D2              | 6        | 6         | 100              | -               | pos | 34.5 ± 4.9    | 13.8 ± 2.8 |
| α-PLT + LCMV WE (10 <sup>6</sup> PFU)  | B10D2              | 6        | 6         | 50               | ++++            | pos | 11.1 ± 3.3    | 13.5 ± 2.5 |
| α-PLT + LCMV WE (10 <sup>6</sup> PFU)  | C57BL/6J           | 6        | 6         | 50               | ++++            | pos | 9.7 ± 2.0     | 14.3 ± 3.0 |
| NaCl                                   | B10D2              | 6        | 1         | 100              | -               | nd  | 46.3 ± 4.3    | nd         |
|                                        |                    |          | 3         | 100              | -               | nd  | 48.2 ± 5.6    | nd         |
|                                        |                    |          | 6         | 100              | -               | nd  | 49.1 ± 4.1    | nd         |
| α-Irr + LCMV Arm (10 <sup>2</sup> PFU) | B10D2              | 6        | 1         | 100              | -               | nd  | 49.5 ± 5.0    | nd         |
|                                        |                    |          | 3         | 100              | -               | nd  | 44.6 ± 5.4    | 6.21 ± 1.4 |
|                                        |                    |          | 6         | 100              | -               | nd  | 43.4 ± 4.6    | nd         |
| α-PLT + LCMV Arm (10 <sup>2</sup> PFU) | B10D2              | 6        | 1         | 100              | +               | nd  | 35.4 ± 4.2    | nd         |
|                                        |                    |          | 3         | 100              | ++              | nd  | 27.6 ± 5.2    | 5.70 ± 1.6 |
|                                        |                    |          | 6         | 100              | ++              | nd  | 23.3 ± 5.0    | nd         |
| NaCl                                   | CD8 <sup>-/-</sup> | 6        | 6         | 100              | -               | neg | 46.0 ± 1.7    | nd         |
| α-Irr + LCMV                           | CD8 <sup>-/-</sup> | 10       | 6         | 100              | -               | pos | 35.3 ± 4.2    | nd         |
| α-PLT + LCMV                           | CD8 <sup>-/-</sup> | 10       | 6         | 60               | ++++            | pos | 11.5 ± 3.8    | nd         |

All measurements were performed at the indicated time post injection (p.i.) of NaCl, LCMV WE, LCMV Arm. Skin hemorrhage was evaluated by visual assessment and expressed on a scale from – (absent) to ++++ (highly abundant). FOB was assessed in fecal pellet pools and results are expressed as either positive (pos) or negative (neg). Hct (mean ± SD) was assessed individually. Total BM or spleen RNA was analyzed for the expression of 2'-5' oligoadenylate synthetase (OAS); the numbers (mean of 6 mice per group) indicate fold induction over NaCl-injected mice 2 days after infection. nd: not done.
