# Supplementary material
Source: PubMed Central journal article supplement (PMC2206587)
Supplement: pnas_0711200105_6.pdf [file pnas_0711200105_6.pdf]

| Treatment                 | Mouse strain | <i>n</i> | Platelets<br>(10 <sup>3</sup> / $\mu$ l) | Percent<br>survival | Hct<br>(percent) | OAS<br>BM      | IFN- $\alpha$<br>(ng/ml) |
|---------------------------|--------------|----------|------------------------------------------|---------------------|------------------|----------------|--------------------------|
| NaCl                      | C57BL/6J     | 4        | 1024 $\pm$ 87                            | 100                 | 45.0 $\pm$ 3.1   | 1*             | und*                     |
| $\alpha$ -Irr + poly(I:C) | C57BL/6J     | 6        | 378 $\pm$ 56                             | 100                 | 39.3 $\pm$ 2.3   | 9.6* $\pm$ 0.9 | 420* $\pm$ 30            |
| $\alpha$ -PLT + poly(I:C) | C57BL/6J     | 6        | 8 $\pm$ 5                                | 67                  | 19.6 $\pm$ 2.1   | 9.9* $\pm$ 0.6 | 450* $\pm$ 40            |
| NaCl                      | BALB/c       | 4        | 992 $\pm$ 70                             | 100                 | 50.1 $\pm$ 2.9   | 1*             | und*                     |
| $\alpha$ -Irr + VSV       | BALB/c       | 6        | 464 $\pm$ 62                             | 100                 | 51.2 $\pm$ 0.7   | 8.7* $\pm$ 0.9 | 380* $\pm$ 30            |
| $\alpha$ -PLT + VSV       | BALB/c       | 6        | 19 $\pm$ 8                               | 100                 | 28.1 $\pm$ 4.7   | 8.9* $\pm$ 0.5 | 400* $\pm$ 50            |
| NaCl                      | B10D2        | 6        | 981 $\pm$ 38                             | 100                 | 46.5 $\pm$ 3.4   | 1              | und                      |
| $\alpha$ -Irr + VV        | B10D2        | 6        | 808 $\pm$ 29                             | 100                 | 42.3 $\pm$ 3.8   | 1.4 $\pm$ 0.5  | 50 $\pm$ 10              |
| $\alpha$ -PLT + VV        | B10D2        | 6        | 16 $\pm$ 7                               | 100                 | 40.7 $\pm$ 4.6   | 1.7 $\pm$ 0.6  | 40 $\pm$ 20              |
| NaCl                      | B10D2        | 6        | 1023 $\pm$ 46                            | 100                 | 46.7 $\pm$ 3.2   | 1              | und                      |
| $\alpha$ -Irr + MCMV      | B10D2        | 6        | 767 $\pm$ 41                             | 100                 | 42.8 $\pm$ 2.8   | 1.4 $\pm$ 0.4  | 50 $\pm$ 10              |
| $\alpha$ -PLT + MCMV      | B10D2        | 6        | 14 $\pm$ 5                               | 100                 | 39.7 $\pm$ 4.5   | 1.8 $\pm$ 0.5  | 60 $\pm$ 20              |

Platelet counts, survival rate, Hct values (mean  $\pm$  SD) were assessed individually in groups of mice 3 d p.i. of poly(I:C) (200 mg/day) or vesicular stomatitis virus (VSV, 2 x 10<sup>6</sup> PFU) or 6 d p.i. of vaccinia virus (VV, 10<sup>7</sup> PFU) or murine cytomegalovirus (MCMV, 10<sup>5</sup> PFU). OAS expression in BM (mean  $\pm$  SD) and serum circulating IFN- $\alpha$  levels (mean  $\pm$  SD) are shown at their peak values, either \*12 hours or 2 days p.i.
