# Supplementary material
Source: PubMed Central journal article supplement (PMC2206587)
Supplement: pnas_0711200105_7.pdf [file pnas_0711200105_7.pdf]

**Table 9. LCMV infection does not induce severe hemorrhagic anemia in mice lacking P-selectin or GPIb $\alpha$  or in mice treated with Warfarin**

| Treatment            | Mouse strain                 | <i>n</i> | Days p.i. | Platelets (10 <sup>3</sup> / $\mu$ l) | Hct (percent)  | PT (INR) |
|----------------------|------------------------------|----------|-----------|---------------------------------------|----------------|----------|
| NaCl                 | C57BL/6J                     | 3        | 6         | 1305 $\pm$ 72                         | 46.7 $\pm$ 3.2 | nd       |
| LCMV                 | C57BL/6J                     | 6        | 6         | 291 $\pm$ 52                          | 34.4 $\pm$ 2.9 | nd       |
| NaCl                 | GPIb $\alpha$ <sup>-/-</sup> | 3        | 6         | 622 $\pm$ 41                          | 47.1 $\pm$ 3.9 | nd       |
| LCMV                 | GPIb $\alpha$ <sup>-/-</sup> | 6        | 6         | 298 $\pm$ 24                          | 36.7 $\pm$ 3.5 | nd       |
| NaCl                 | P-selectin <sup>-/-</sup>    | 3        | 6         | 902 $\pm$ 43                          | 44.7 $\pm$ 2.5 | nd       |
| LCMV                 | P-selectin <sup>-/-</sup>    | 6        | 6         | 245 $\pm$ 30                          | 34.3 $\pm$ 3.7 | nd       |
| NaCl                 | B10.D2                       | 6        | 6         | 1247 $\pm$ 34                         | 48.4 $\pm$ 2.3 | 0.8      |
| $\alpha$ -PLT + LCMV | B10.D2                       | 6        | 6         | 8 $\pm$ 2                             | 10.2 $\pm$ 2.9 | 0.8      |
| Diluent + LCMV       | B10.D2                       | 6        | 6         | 204 $\pm$ 63                          | 38.3 $\pm$ 3.8 | 0.8      |
| Warfarin + LCMV      | B10.D2                       | 6        | 6         | 222 $\pm$ 58                          | 38.2 $\pm$ 4.1 | 5.8      |

All measurements were performed at the indicated time post injection (p.i.) of NaCl or LCMV Arm (10<sup>6</sup> PFU/mouse). Platelets and Hct (mean  $\pm$  SD) were assessed individually. Prothrombin time (PT) was assessed in blood sample pools obtained from each group; nd: not done; INR: international normalized ratio.
